# Supplementary material
Source: HighWire-hosted journal article supplement (https://rmdopen.bmj.com/content/8/2/e002614)
Supplement: inline-supplementary-material-1 [file inline-supplementary-material-1.pdf]

Supplementary Table 1. Additional demographics and baseline characteristics of study population

| Variables                     | <i>Before IPTW</i> |                   |       | <i>After IPTW</i> |                   |       |
|-------------------------------|--------------------|-------------------|-------|-------------------|-------------------|-------|
|                               | JAKi<br>(n=1,064)  | TNFi<br>(n=3,865) | ASD   | JAKi<br>(n=4,101) | TNFi<br>(n=5,131) | ASD   |
| <b>Age group</b>              |                    |                   | 0.13  |                   |                   | 0.11  |
| < 30 years                    | 36 (3.4)           | 160 (4.1)         |       | 182 (4.5)         | 198 (3.9)         |       |
| 30~39 years                   | 81 (7.6)           | 428 (11.1)        |       | 445 (10.9)        | 517 (10.1)        |       |
| 40~49 years                   | 190 (17.9)         | 722 (18.7)        |       | 709 (17.3)        | 981 (19.1)        |       |
| 50~59 years                   | 347 (32.6)         | 1,165 (30.1)      |       | 1,253 (30.6)      | 1,583 (30.8)      |       |
| 60~69 years                   | 264 (24.8)         | 912 (23.6)        |       | 1,034 (25.2)      | 1,216 (23.7)      |       |
| 70~79 years                   | 132 (12.4)         | 411 (10.6)        |       | 426 (10.4)        | 555 (10.8)        |       |
| 80 years or more              | 14 (1.3)           | 67 (1.7)          |       | 50 (1.2)          | 81 (1.6)          |       |
| <b>Region</b>                 |                    |                   | 0.18  |                   |                   | 0.02  |
| Capital                       | 287 (27.0)         | 788 (20.4)        |       | 948 (23.1)        | 1,176 (22.9)      |       |
| Metropolitan city             | 220 (20.7)         | 943 (24.4)        |       | 1,020 (24.9)      | 1,224 (23.9)      |       |
| Others                        | 557 (52.4)         | 2,134 (55.2)      |       | 2,133 (52.0)      | 2,732 (53.2)      |       |
| <b>Income</b>                 |                    |                   | 0.08  |                   |                   | <0.01 |
| 1 <sup>st</sup> quintile      | 243 (22.8)         | 812 (21.0)        |       | 842 (20.5)        | 1,072 (20.9)      |       |
| 2 <sup>nd</sup> quintile      | 136 (12.8)         | 557 (14.4)        |       | 572 (14.0)        | 695 (13.6)        |       |
| 3 <sup>rd</sup> quintile      | 166 (15.6)         | 656 (17.0)        |       | 646 (15.7)        | 835 (16.3)        |       |
| 4 <sup>th</sup> quintile      | 211 (19.8)         | 854 (22.1)        |       | 861 (21.0)        | 1,081 (21.1)      |       |
| 5 <sup>th</sup> quintile      | 308 (29.0)         | 986 (25.5)        |       | 1,180 (28.8)      | 1,448 (28.2)      |       |
| <b>Healthcare utilisation</b> |                    |                   |       |                   |                   |       |
| Outpatient visit              | 1,063 (99.9)       | 3,861 (99.9)      | <0.01 | 4,091 (99.8)      | 5,126 (99.9)      | 0.03  |
| Hospitalisation               | 300 (28.2)         | 1,366 (35.3)      | 0.15  | 1,597 (38.9)      | 1,692 (33.0)      | 0.12  |
| Emergency department visits   | 157 (14.8)         | 546 (14.1)        | 0.02  | 626 (15.3)        | 714 (13.9)        | 0.04  |

Values are presented as numbers (%). IPTW, inverse probability of treatment weighting; JAKi, Janus kinase inhibitor; TNFi, tumour necrosis factor inhibitor; ASD, absolute standardised difference.

Supplementary Table 2. Adjusted HR of malignancy in RA patients treated with JAKi compared with those treated with TNFi

|                                  | Weighted HR (95% CI) | Adjusted HR* (95% CI) |
|----------------------------------|----------------------|-----------------------|
| <b>Overall malignancy</b>        | 0.83 (0.55–1.27)     | 0.76 (0.49–1.20)      |
| <b>Solid malignancy</b>          | 0.77 (0.50–1.19)     | 0.71 (0.44–1.13)      |
| <b>Haematological malignancy</b> | 2.86 (0.41–20.00)    | 3.51 (0.81–15.20)     |

Incidence rate per 100 person-years was calculated. HR, hazard ratio; RA, rheumatoid arthritis; JAKi, Janus kinase inhibitor; TNFi, tumour necrosis factor inhibitor.

\*Adjusted for age group, year of initiating JAKi or TNFi, seropositivity, mild liver disease, cerebrovascular disease, previous use of methotrexate, hydroxychloroquine, cyclosporine, azathioprine and oral corticosteroids, and concomitant use of methotrexate and oral corticosteroids

Supplementary Table 3. The risk of malignancy in RA patients treated with tofacitinib versus TNFi

|                           | Type of targeted therapy | Number of patients | Number of events | Total observation periods (person-year) | IR (95% CI)      | HR (95% CI)       |
|---------------------------|--------------------------|--------------------|------------------|-----------------------------------------|------------------|-------------------|
| <i>Before IPTW</i>        |                          |                    |                  |                                         |                  |                   |
| Overall malignancy        | Tofacitinib              | 984                | 7                | 1,238.4                                 | 0.57 (0.27–1.19) | 0.71 (0.32–1.61)  |
|                           | TNFi                     | 3,865              | 58               | 6,823.8                                 | 0.85 (0.66–1.10) |                   |
| Solid malignancy          | Tofacitinib              | 984                | 6                | 1,238.4                                 | 0.48 (0.22–1.08) | 0.64 (0.27–1.52)  |
|                           | TNFi                     | 3,865              | 56               | 6,823.8                                 | 0.82 (0.63–1.07) |                   |
| Haematological malignancy | Tofacitinib              | 984                | 1                | 1,238.4                                 | 0.08 (0.01–0.57) | 2.48 (0.16–38.01) |
|                           | TNFi                     | 3,865              | 2                | 6,823.8                                 | 0.03 (0.01–0.12) |                   |
| <i>After IPTW</i>         |                          |                    |                  |                                         |                  |                   |
| Overall malignancy        | Tofacitinib              | 3,872              | 34               | 4,841.8                                 | 0.69 (0.49–0.97) | 0.85 (0.56–1.29)  |
|                           | TNFi                     | 5,131              | 72               | 8,457.1                                 | 0.85 (0.67–1.07) |                   |
| Solid malignancy          | Tofacitinib              | 3,872              | 30               | 4,841.8                                 | 0.63 (0.44–0.89) | 0.79 (0.51–1.21)  |
|                           | TNFi                     | 5,131              | 70               | 8,457.1                                 | 0.82 (0.65–1.04) |                   |
| Haematological malignancy | Tofacitinib              | 3,872              | 3                | 4,841.8                                 | 0.07 (0.02–0.20) | 2.90 (0.42–19.93) |
|                           | TNFi                     | 5,131              | 2                | 8,457.1                                 | 0.02 (0.01–0.10) |                   |

Incidence rate per 100 person-years was calculated. RA, rheumatoid arthritis; TNFi, tumour necrosis factor inhibitor; IR, incidence rate; HR, hazard ratio; IPTW, inverse probability of treatment weighting.
